# Supplementary material
Source: PubMed Central journal article supplement (PMC3722304)
Supplement: NIHMS479304-supplement-supplement_1.pdf [file NIHMS479304-supplement-supplement_1.pdf]

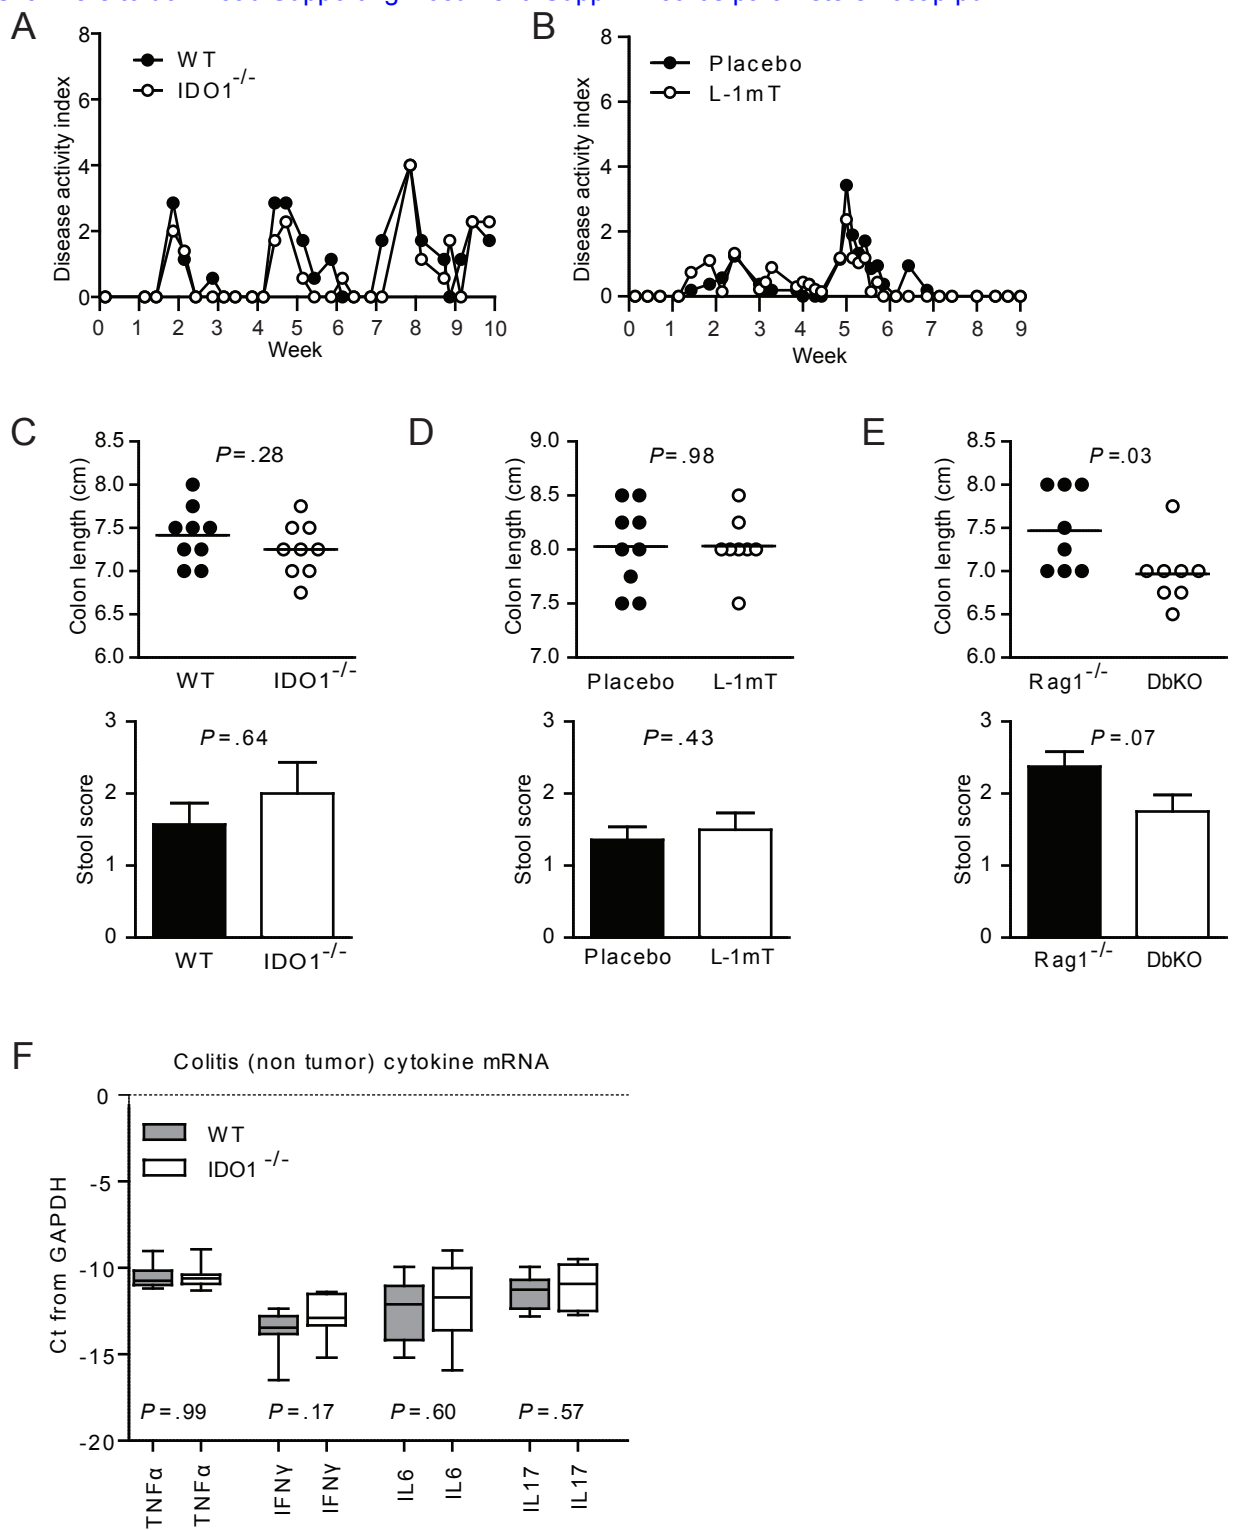

Supplementary Figure 1: Surrogate markers of colitis activity for comparator groups

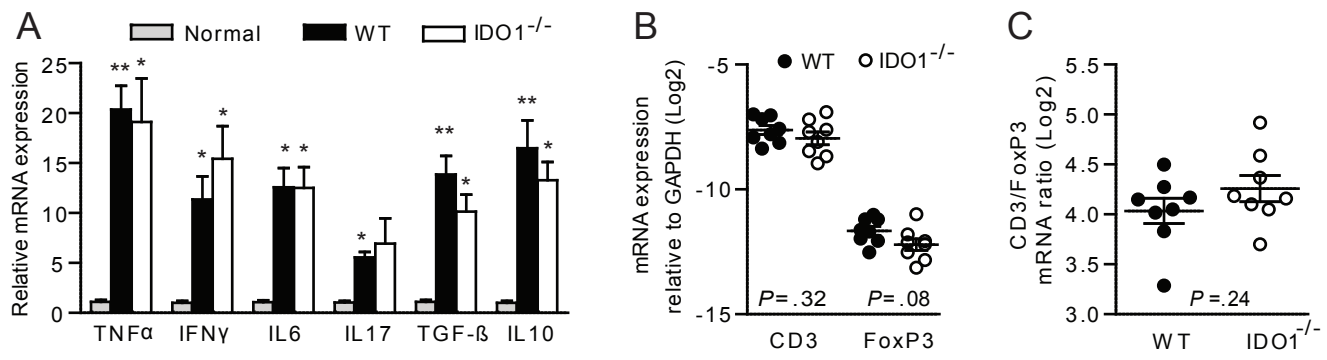

**Supplementary Figure 2:** Cytokine and T-cell profiles of WT and IDO1<sup>-/-</sup> mouse tumors.

## SUPPLEMENTARY FIGURE 3

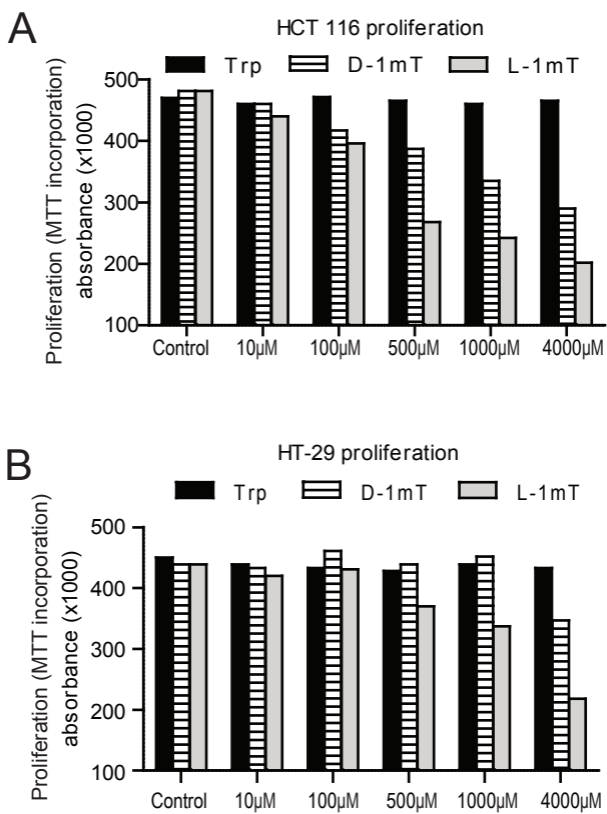

**Supplementary Figure 3:** IDO1 inhibitors L-1mT and D-1mT exert direct concentration dependent suppression of proliferation in two human colon cancer cell lines with constitutive and inducible IDO1 expression

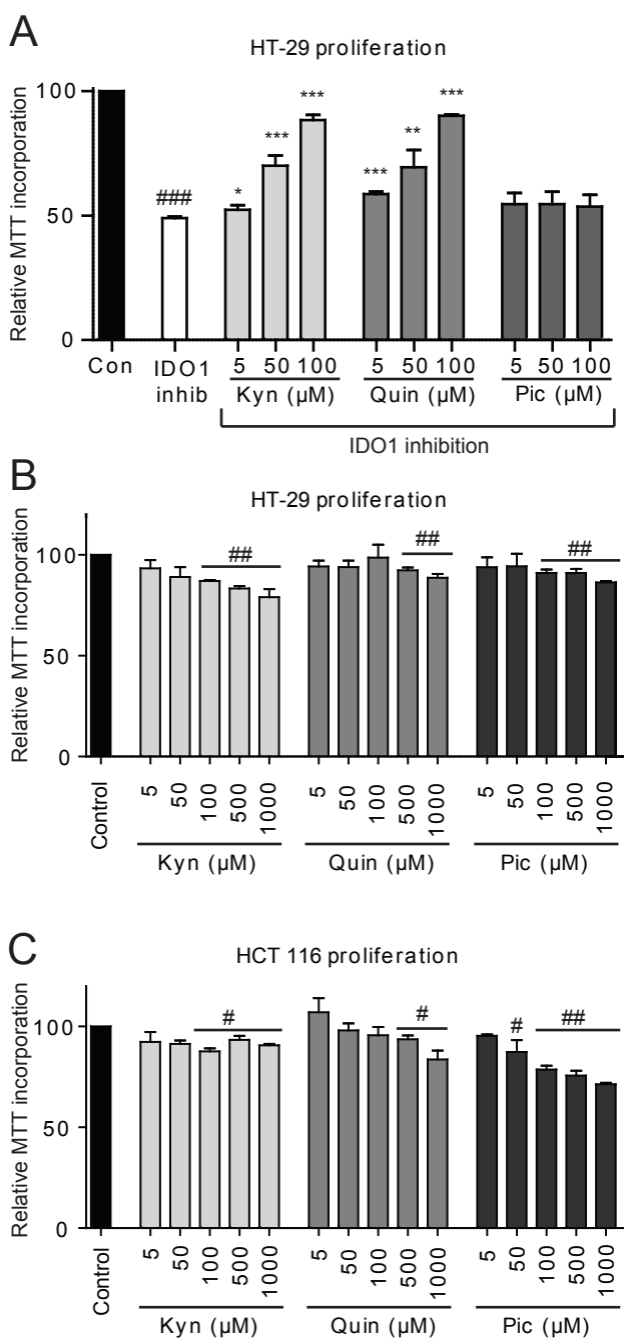

**Supplementary Figure 4:** IDO1 expressing colon cancer cells have increased proliferation in response to kynurenine based tryptophan catabolites when IDO1 activity is blocked.

**Supplementary Table 1: qRT-PCR primers**

| <b>Gene</b>                   | <b>Forward Primer</b>             | <b>Reverse Primer</b>           |
|-------------------------------|-----------------------------------|---------------------------------|
| <b>Mouse Ido1</b>             | CGG ACT GAG AGG ACA CAG GTT AC    | ACA CAT ACG CCA TGG TGA TGT AC  |
| <b>Human IDO1</b>             | CAC TTT GCT AAA GGC GCT GTT GGA   | GGT TGC CTT TCC AGC CAG ACA AAT |
| <b>CD3e</b>                   | ATG CGG TGG AAC ACT TTC TGG       | GCA CGT CAA CTC TAC ACT GGT     |
| <b>FoxP3</b>                  | CCC ATC CCC AGG AGT CTT G         | ACC ATG ACT AGG GGC ACT GTA     |
| <b>IL17</b>                   | CTC CAG AAG GCC CTC AGA CTA C     | GGG TCT TCA TTG CGG TGG         |
| <b>GAPDH</b>                  | TGC ACC ACC AAC TGC TTA G         | GAT GCA GGG ATG ATG TTC         |
| <b>TNF<math>\alpha</math></b> | GAC CCT CAG ACT CAG ATC ATC TTC T | CCA CTT GGT GGT TTG CTA CGA     |
| <b>IFN<math>\gamma</math></b> | AGG CCA TCA GCA ACA ACA TAA GCG   | TGG GTT GTT GAC CTC AAA CTT GGC |
| <b>IFN<math>\alpha</math></b> | TGC TTT CCT GAT GAC CCT GCT AGT   | ATC CCA AGC AGC AGA TGA GTC CTT |
| <b>IL6</b>                    | CCA GAA ACC GCT ATG AAG TTC CT    | CAC CAG CAT CAG TCC CAA GA      |
| <b>IL10</b>                   | CCC TTT GCT ATG GTG TCC TT        | TGG TTT CTC TTC CCA AGA CC      |
| <b>TGF<math>\beta</math></b>  | AGT GTG ACC TGG AGT TTC GGA GAT   | TTG CCC TGA GGA CTT TCT TGA CCT |
| <b>IL1<math>\beta</math></b>  | TCA GGC AGG CAG TAT CAC TCA       | GGA AGG TCC ACG GGA AAG AC      |
| <b>Axin2</b>                  | CAA CAC CAG GCG GAA CGA A         | GCC CAA TAA GGA GTG TAA GGA CT  |

**Supplementary Table 1: qRT-PCR primers**

**Supplementary Figure 1:** Surrogate markers of colitis activity for comparator groups. A,B) Disease activity index (diarrhea + hematochezia). C-E) Colon length and final day stool score for comparator groups: WT vs IDO1<sup>-/-</sup>, Placebo vs L-1mT, Rag<sup>-/-</sup> and Rag<sup>-/-</sup>/IDO1<sup>-/-</sup> (DbKO) mice. (Final Stool scoring based on the following: 0-normal dry pellet; 1-moist formed pellet; 2-soft poorly formed stool; 3-diarrhea/stool present on fur) F) Colitis-associated cytokines from non-tumor distal colon tissue of WT vs IDO1<sup>-/-</sup> (n=8/group).

**Supplementary Figure 2:** Cytokine and T-cell profiles of WT and IDO1<sup>-/-</sup> mouse tumors. A) Profile of tumor cytokines relevant in colitis associated cancer compared to adjacent non-tumor tissue with all samples normalized to GAPDH. B) CD3 and FoxP3 mRNA expression in tumors relative to GAPDH. C) CD3e/FoxP3 ratio per individual tumor. n=6-8 mice/group ≥1 tumor/mouse. \**P*<.05 and \*\**P*<.01 for tumor vs non-tumor tissue. No significant difference between WT and IDO1<sup>-/-</sup> for any cytokine.

**Supplementary Figure 3:** IDO1 inhibitors L-1mT and D-1mT exert direct concentration dependent suppression of proliferation in two human colon cancer cell lines with constitutive and inducible IDO1 expression A) HCT 116 cells B) HT-29 cells. Tryptophan (as control) or 1mT added to media 24 hours after cell plating and allowed to incubate in culture x72 hours prior to MTT proliferation assay.

**Supplementary Figure 4:** IDO1 expressing colon cancer cells have increased proliferation in response to kynurenine based tryptophan catabolites when IDO1 activity is blocked. HCT 116 and HT-29 cells were treated with kynurenine metabolites in the setting of A) IDO1 blockade (500 mg L-1mT and silIDO) or B-C) constitutive IDO1 expression for a total of 48 hours. MTT incorporation assay was used to assess proliferation. \**P*<0.05, \*\**P*<0.01, \*\*\**P*<0.001 vs IDO1 inhibition state. #*P*<0.05, ## *P*<0.01 vs control.

**Supplementary Table 1: qRT-PCR primers**

**Supplementary Figure 1:** Surrogate markers of colitis activity for comparator groups. A,B) Disease activity index (diarrhea + hematochezia). C-E) Colon length and final day stool score for comparator groups: WT vs IDO1<sup>-/-</sup>, Placebo vs L-1mT, Rag<sup>-/-</sup> and Rag<sup>-/-</sup>/IDO1<sup>-/-</sup> (DbKO) mice. (Final Stool scoring based on the following: 0-normal dry pellet; 1-moist formed pellet; 2-soft poorly formed stool; 3-diarrhea/stool present on fur) F) Colitis-associated cytokines from non-tumor distal colon tissue of WT vs IDO1<sup>-/-</sup> (n=8/group).

**Supplementary Figure 2:** Cytokine and T-cell profiles of WT and IDO1<sup>-/-</sup> mouse tumors. A) Profile of tumor cytokines relevant in colitis associated cancer compared to adjacent non-tumor tissue with all samples normalized to GAPDH. B) CD3 and FoxP3 mRNA expression in tumors relative to GAPDH. C) CD3e/FoxP3 ratio per individual tumor. n=6-8 mice/group ≥1 tumor/mouse. \**P*<.05 and \*\**P*<.01 for tumor vs non-tumor tissue. No significant difference between WT and IDO1<sup>-/-</sup> for any cytokine.

**Supplementary Figure 3:** IDO1 inhibitors L-1mT and D-1mT exert direct concentration dependent suppression of proliferation in two human colon cancer cell lines with constitutive and inducible IDO1 expression A) HCT 116 cells B) HT-29 cells. Tryptophan (as control) or 1mT added to media 24 hours after cell plating and allowed to incubate in culture x72 hours prior to MTT proliferation assay.

**Supplementary Figure 4:** IDO1 expressing colon cancer cells have increased proliferation in response to kynurenine based tryptophan catabolites when IDO1 activity is blocked. HCT 116 and HT-29 cells were treated with kynurenine metabolites in the setting of A) IDO1 blockade (500 mg L-1mT and silIDO) or B-C) constitutive IDO1 expression for a total of 48 hours. MTT incorporation assay was used to assess proliferation. \**P*<0.05, \*\**P*<0.01, \*\*\**P*<0.001 vs IDO1 inhibition state. #*P*<0.05, ## *P*<0.01 vs control.
